# Supplementary material
Source: Springer Nature journal article supplement (https://www.springermedizin.de/resource/supplementary/13256_2012_2279_MOESM3_ESM.pdf/9649346)

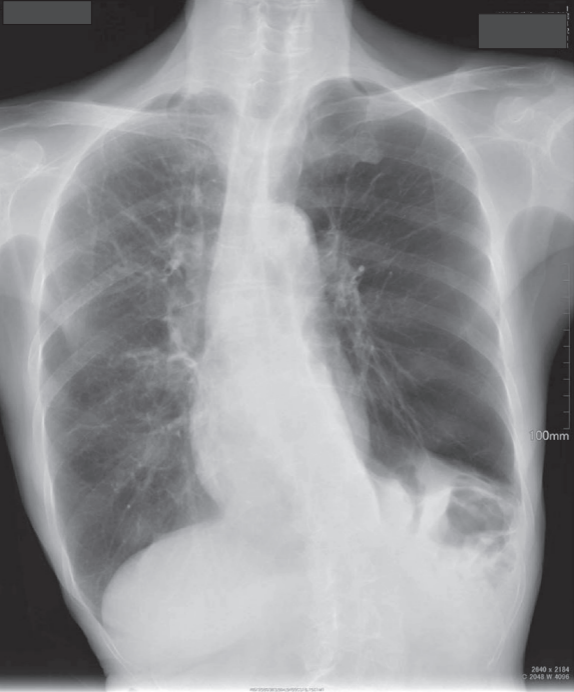

100mm

2840 x 2184  
© 2048 W 4096

Supplement: MOESM3 [file 9649346]
